# Supplementary material
Source: MDPI journal article supplement (https://www.mdpi.com/2073-4441/13/14/1945)
Supplement: s1 [file s1]

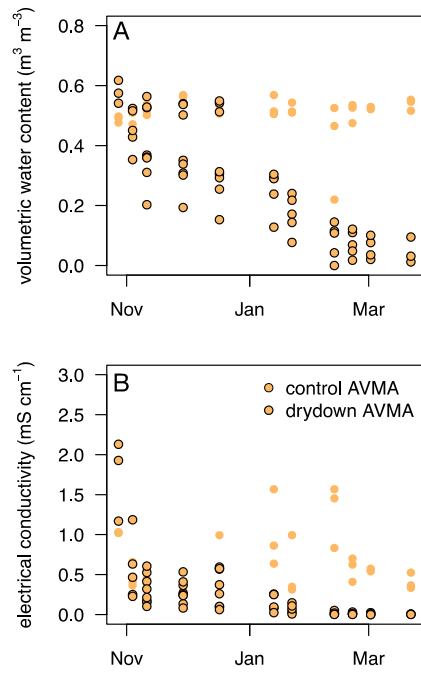

**Figure S1.** Time course of volumetric water content (A) and electrical conductivity (B) for control and treatment A. *marina* plants during the drought experiment.

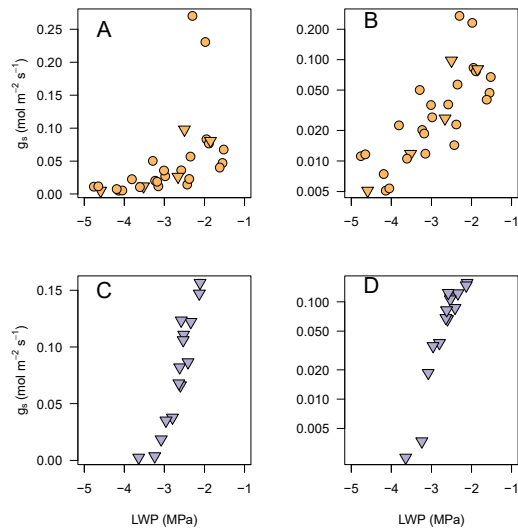

**Figure S2.** The relationship between stomatal conductance ( $g_s$ ) and leaf water potential (LWP) during the drought experiment of (A, B) *Avicennia marina* (inverted triangles show data for one individual that died before the last measurement) and (C, D) *Bruguiera gymnorhiza*. The left panels (A, C) show  $g_s$  plotted on arithmetic scale, and the right panels (B, D) show log-scaled  $g_s$ .
